# Supplementary material for: A Review of Multi-Objective Optimization in Organic Rankine Cycle (ORC) System Design
Source: MDPI journal article supplement (doi:10.3390/en14206492), 2021-10-11
Supplement: s1 [file s1]

---

*Supplementary Materials for Manuscript:*

# **A review of multi-objective optimization in organic Rankine cycle (ORC) system design**

**Shuozhuo Hu, Zhen Yang, Jian Li and Yuanyuan Duan\***

Key Laboratory for Thermal Science and Power Engineering of MOE, Key Laboratory for CO<sub>2</sub>, Utilization and Reduction Technology, Tsinghua University, Beijing 100084, China; hsz17@mails.tsinghua.edu.cn (S.H.); zhenyang@tsinghua.edu.cn (Z.Y.); lijian20@mail.tsinghua.edu.cn (J.L.)

\* Correspondence: yyduan@tsinghua.edu.cn

**Table S1.** List of reviewed papers.

|    | Year | Author | Ns  | Optimization objective                                            | Optimization method | Parameter level       | Decision making                |
|----|------|--------|-----|-------------------------------------------------------------------|---------------------|-----------------------|--------------------------------|
| 1  | 2021 | [58]   | 2   | Thermal efficiency+LEC                                            | NSGA-II             | System                | TOPSIS                         |
| 2  | 2021 | [23]   | 2   | Exergy efficiency+PBP+Carbon emission                             | NSGA-II             | System                | TOPSIS                         |
| 3  | 2021 | [60]   | 2+3 | Power output+PBP+LCOE+SIC                                         | NSGA-II             | System                | TOPSIS                         |
| 4  | 2021 | [22]   | 2   | Exergy efficiency+SIC                                             | OPPSS+MOPSO+NSGA-II | System+Heat exchanger | TOPSIS                         |
| 5  | 2021 | [126]  | 2   | Thermal efficiency+TurbinePower output/Size                       | NSGA-II             | System+Turbine        | TOPSIS                         |
| 6  | 2021 | [45]   | 2   | Exergy efficiency+EPC (Power output+EPC)                          | NSGA-II             | System                | TOPSIS                         |
| 7  | 2021 | [48]   | 2   | NPV+Electricity generation                                        | NSGA-II             | System                | LINMAP                         |
| 8  | 2021 | [62]   | 2   | Power output-Thermal efficiency-Exergy efficiency+Carbon emission |                     | System                | TOPSIS                         |
| 9  | 2021 | [127]  | 2   | Turbine efficiency+Turbine Power output                           | MOGA                | Turbine               |                                |
| 10 | 2020 | [134]  | 2   | Thermal efficiency+Power output/Molar mass                        | MOGA                | System+Fluid          |                                |
| 11 | 2020 | [59]   | 2   | Exergy efficiency+PBP+Carbon emission                             | NSGA-II             | System                | GRA                            |
| 12 | 2020 | [44]   | 2   | Exergy efficiency+PBP                                             | NSGA-II             | System                | TOPSIS+GRA                     |
| 13 | 2020 | [94]   | 2   | Exergy efficiency+Thermal efficiency                              |                     | System                |                                |
| 14 | 2020 | [143]  | 3   | Power output+Exergy efficiency+Thermal efficiency                 | NSGA-II             | System                | TOPSIS                         |
| 15 | 2020 | [112]  | 2   | Custom:Thermal efficiency*Exergy efficiency, Total cost/PBP       | NSGA-II             | System                | TOPSIS                         |
| 16 | 2020 | [113]  | 2   | Custom:Thermal efficiency*Exergy efficiency, Total cost/PBP       | NSGA-II             | System                |                                |
| 17 | 2020 | [90]   | 3   | Power output+EPC+Carbon emission                                  | MOGA                | System                | TOPSIS+MFE+VBR                 |
| 18 | 2020 | [18]   | 2   | Exergy efficiency+PBP                                             | NSGA-II             | System                |                                |
| 19 | 2020 | [20]   | 2   | Exergy efficiency+SIC                                             | WSM+GA              | System                |                                |
| 20 | 2020 | [1]    | 2   | Exergy efficiency+PBP                                             | MOGA                | System                |                                |
| 21 | 2020 | [97]   | 2   | Thermal efficiency+LEC                                            | MOHTS               | System                |                                |
| 22 | 2020 | [53]   | 2+3 | Exergy efficiency +Exergoeconomic +Exergoenvironmental            | MOGA                | System                | TOPSIS                         |
| 23 | 2020 | [114]  | 2   | Exergy efficiency+Heat exchanger area                             | NSGA-II             | System                | TOPSIS                         |
| 24 | 2020 | [107]  | 2   | Exergy efficiency+Heat exchanger area                             | NSGA-II             | System                | TOPSIS+LINMAP+ Shannon Entropy |
| 25 | 2020 | [128]  | 2   | Cultom: Exergy efficiency+Heat exchanger area                     | NSGA-II             | System+Turbine        | LINMAP                         |
| 26 | 2020 | [116]  | 2   | Electricity generation+NPV                                        | NSGA-II             | System                | LINMAP                         |
| 27 | 2020 | [103]  | 2   | Custom: MPO+LEC                                                   | NSGA-II             | System                | TOPSIS+LINMAP+ VIKOR+WASPAS    |
| 28 | 2020 | [109]  | 3   | Power output+Exergy efficiency+Exergoeconomic                     | NSGA-II             | System                | LINMAP                         |
| 29 | 2020 | [28]   | 2   | Exergy efficiency+UA                                              | NSGA-II             | System                | TOPSIS                         |
| 30 | 2020 | [147]  | 2   | Power output+Thermal efficiency                                   | NSGA-II             | System                | TOPSIS                         |
| 31 | 2020 | [91]   | 2   | Exergy efficiency+Thermal efficiency                              | WSM+GRA             | System                |                                |
| 32 | 2020 | [83]   | 2   | Exergy efficiency+Thermal efficiency                              | WSM                 | System                |                                |
| 33 | 2019 | [36]   | 4   | Exergy efficiency+Thermal efficiency+Cost+ Carbon emission        | WSM+AHP             | System                |                                |
| 34 | 2019 | [69]   | 3   | Entropy production rate+Cost+Volume                               | NSGA-II             | Heat exchanger        |                                |
| 35 | 2019 | [138]  | 2   | Power output+Heat exchanger area                                  | MOGA                | System+Fluid          |                                |

|    | Year | Author | Ns | Optimization objective                                     | Optimization method                                    | Parameter level             | Decision making       |
|----|------|--------|----|------------------------------------------------------------|--------------------------------------------------------|-----------------------------|-----------------------|
| 36 | 2019 | .[122] | 3  | Power output+Total cost+SIC                                | NSGA-II                                                | System+Heat exchanger+Fluid |                       |
| 37 | 2019 | .[98]  | 2  | Exergy efficiency+SIC                                      | ACS(Artificial Cooperative Search)                     | System+Heat exchanger       | TOPSIS                |
| 38 | 2019 | .[29]  | 2  | Exergy efficiency+UA                                       | NSGA-II                                                | System                      |                       |
| 39 | 2019 | .[133] | 2  | Exergy efficiency+Expander volume flow ratio               | MOGA                                                   | System                      |                       |
| 40 | 2019 | .[40]  | 3  | Power output+Carbon cost+Water cost                        | MOGA                                                   | System                      | GRA                   |
| 41 | 2019 | .[100] | 2  | Exergy efficiency+Thermal efficiency                       | ABC (artificial bee colony)                            | System                      |                       |
| 42 | 2019 | .[129] | 3  | Power output+Thermal efficiency+UA                         | WSM+SANO+SLSQP                                         | System+Turbine              |                       |
| 43 | 2019 | .[110] | 2  | Thermal efficiency+Annual total cost                       |                                                        | System                      | LINMAP                |
| 44 | 2019 | .[102] | 2  | Exergy efficiency+SIC                                      | MOGA                                                   | System                      | LINMAP                |
| 45 | 2019 | .[99]  | 2  | Thermal efficiency+SIC                                     | MOGWO (multi-objective grey wolf optimizer)            | System                      | LINMAP                |
| 46 | 2019 | .[149] | 2  | Exergoeconomic+SIC                                         | MOGWO                                                  | System                      | TOPSIS                |
| 47 | 2019 | .[111] | 2  | Thermal efficiency+Exergoeconomic                          | NSGA-II                                                | System                      | LINMAP                |
| 48 | 2019 | .[75]  | 2  | Exergy efficiency+Risk distance                            | NSGA-II                                                | System                      | TOPSIS+LINMAP         |
| 49 | 2019 | .[56]  | 2  | Heat exchanger area/Power (APR) + SI                       | WSM                                                    | System                      |                       |
| 50 | 2019 | .[66]  | 2  | Heat exchanger area/Power (APR) + SI                       | NSGA-II+WSM                                            | System                      |                       |
| 51 | 2019 | .[73]  | 4  | Power output+Cost+Mass+Volume                              | MOGA                                                   | System                      |                       |
| 52 | 2019 | .[123] | 2  | Power output+Heat exchanger area                           | WSM                                                    | System+Heat exchanger       |                       |
| 53 | 2019 | .[101] | 2  | Custom: Utilization rate+SIC                               | SAFA (multi-objective self-adaptive firefly algorithm) | System                      | LINMAP                |
| 54 | 2019 | .[46]  | 2  | Power output+EPC                                           | MOGA                                                   | System                      | TOPSIS                |
| 55 | 2019 | .[32]  | 2  | Custom: UA/Power output+Turbine size/Power output          | NSGA-II                                                | System+Turbine              | TOPSIS                |
| 56 | 2019 | .[70]  | 3  | Electricity generation+Heat exchanger volume+ NPV          | MOGA                                                   | System+Heat exchanger       |                       |
| 57 | 2018 | .[84]  | 2  | Exergy efficiency+Custom: Heat exchanger area/Power output | WSM                                                    | System                      |                       |
| 58 | 2018 | .[108] | 2  | Exergy efficiency+LEC                                      | NSGA-II                                                | System                      | Fuzzy set theory, GRA |
| 59 | 2018 | .[63]  | 2  | Power output+Environmental                                 | $\varepsilon$ -constraint                              | System                      | LINMAP                |
| 60 | 2018 | .[105] | 2  | Net profit+PBP                                             |                                                        | System                      | TOPSIS                |
| 61 | 2018 | .[148] | 2  | Power output+Outlet temperature of heat source             | MOGA                                                   | System                      | TOPSIS                |
| 62 | 2018 | .[52]  | 2  | Exergy efficiency+Exergoeconomic                           | NSGA-II                                                | System                      |                       |
| 63 | 2018 | .[92]  | 2  | Exergy efficiency+LCOE                                     | MOPSO                                                  | System                      | LINMAP                |
| 64 | 2018 | .[42]  | 2  | Exergy efficiency+SIC                                      | MOGA                                                   | System                      |                       |
| 65 | 2018 | .[93]  | 2  | Power output+Heat exchanger area                           | MOEA                                                   | System                      |                       |
| 66 | 2018 | .[54]  | 2  | Power output+Exergoeconomic                                | NSGA-II                                                | System                      |                       |
| 67 | 2018 | .[25]  | 3  | Power output+Exergy efficiency+UA                          | NSGA-II                                                | System                      |                       |
| 68 | 2018 | .[61]  | 2  | Exergy efficiency+ Custom: LCA/Heat absorption             | MOGA                                                   | System                      |                       |
| 69 | 2018 | .[77]  | 2  | Electricity generation+Custom: Power fluctuation           | MOGA                                                   | System                      |                       |
| 70 | 2018 | [117]  | 2  | Power output+Total cost                                    | MOGA                                                   | System+Process              |                       |
| 71 | 2018 | .[87]  | 2  | Exergy efficiency+SIC                                      | WSM                                                    | System                      |                       |
| 72 | 2018 | .[85]  | 2  | Custom:area/Power+SI                                       | WSM                                                    | System                      |                       |
| 73 | 2018 | .[104] | 2  | Exergy efficiency+SIC                                      | NSGA-II                                                | System                      | LINMAP                |

|     | Year | Author | Ns | Optimization objective                                                            | Optimization method      | Parameter level       | Decision making                |
|-----|------|--------|----|-----------------------------------------------------------------------------------|--------------------------|-----------------------|--------------------------------|
| 74  | 2018 | [.31]  | 2  | Power output+Heat exchanger area                                                  | NSGA-II                  | System                |                                |
| 75  | 2018 | [.55]  | 2  | Exergy efficiency+Exergoeconomic                                                  | NSGA-II                  | System                | LINMAP                         |
| 76  | 2017 | [.88]  | 2  | LCOE+PBP/Usable heat factor                                                       | WSM+ $\alpha$ method     | System                |                                |
| 77  | 2017 | [.106] | 2  | Power output+Total cost                                                           | MOGA                     | System                | TOPSIS                         |
| 78  | 2017 | [.115] | 2  | Exergy efficiency+ EPC                                                            | NSGA-II                  | System                | GRA                            |
| 79  | 2017 | [.30]  | 2  | Exergy efficiency+UA                                                              | MOGA                     | System                |                                |
| 80  | 2017 | [.121] | 2  | Power output+Total cost                                                           | SNOPT +CPLEX             | System+Turbine+Fluid  |                                |
| 81  | 2017 | [.57]  | 3  | Profit+Carbon emission+Safety                                                     | GAMS                     | System                |                                |
| 82  | 2017 | [.82]  | 4  | Power output+Exergy efficiency+Thermal efficiency+Cost                            | WSM                      | System                |                                |
| 83  | 2017 | [.71]  | 3  | Total cost+Evaporator volume+Pressure drop                                        | WSM+PSO                  | Heat exchanger        |                                |
| 84  | 2017 | [.24]  | 2  | Thermal efficiency+Heat exchanger area                                            | MOGA                     | System                |                                |
| 85  | 2017 | [.15]  | 3  | Exergy efficiency+Thermal efficiency+ Total cost                                  | NSGA-II+MOPSO+MOEA       | System                |                                |
| 86  | 2017 | [.78]  | 2  | Thermal efficiency+Variance of thermal efficiency                                 | NSGA                     | System                |                                |
| 87  | 2017 | [.26]  | 2  | Thermal efficiency+UA                                                             | NSGA                     | System                |                                |
| 88  | 2017 | [.141] | 5  | Power output+Exergy efficiency+ Thermal efficiency+Production cost+Exergoeconomic | MCDM                     | System                |                                |
| 89  | 2017 | [.33]  | 2  | Thermal efficiency+Turbine size/Power output                                      | MOFA (firefly algorithm) | System+Turbine        | TOPSIS                         |
| 90  | 2017 | [.130] | 2  | Turbine efficiency+Turbine power output                                           | MOGA                     | Turbine               |                                |
| 91  | 2016 | [.17]  | 2  | Power output+Turbine size                                                         | MOGA                     | System                | TOPSIS                         |
| 92  | 2016 | [.43]  | 2  | Power output+ SIC                                                                 |                          | System                |                                |
| 93  | 2016 | [.89]  | 2  | Exergy efficiency+SIC                                                             | WSM                      | System                |                                |
| 94  | 2016 | [.35]  | 3  | SIC+Heat exchanger area+Turbine flow rate/Power output                            | MOGA-II                  | System                | TOPSIS                         |
| 95  | 2016 | [.65]  | 3  | Exergy efficiency+ Exergoeconomic+ Exergoenvironmental                            | MOPSO                    | System                | Fuzzy method                   |
| 96  | 2016 | [.11]  | 2  | Power output+Total cost                                                           | MOGA                     | System+Heat exchanger |                                |
| 97  | 2015 | [.10]  | 2  | Power output+Total cost                                                           | MOGA                     | System                |                                |
| 98  | 2015 | [.68]  | 2  | SIC+SI                                                                            | WSM                      | System                |                                |
| 99  | 2015 | [.14]  | 2  | Exergy efficiency+ Annual cash flow                                               | MOGA                     | System                |                                |
| 100 | 2015 | [.86]  | 4  | Power output+Evaporator area+Condenser area+Speed                                 | WSM                      | System                |                                |
| 101 | 2015 | [.132] | 3  | Exergy efficiency+Thermal efficiency+LEC                                          | NSGA-II                  | System                |                                |
| 102 | 2015 | [.34]  | 2  | Thermal efficiency+Turbine size                                                   | DIRECT                   | System+Turbine        |                                |
| 103 | 2015 | [.6]   | 2  | Power output+SIC                                                                  | NSGA-II                  | System+Heat exchanger |                                |
| 104 | 2015 | [.64]  | 11 | Power output+ efficiency+Total cost+PBP+NPV+Carbon emission+NOx                   | WSM+GA                   | System+Heat exchanger |                                |
| 105 | 2015 | [.124] | 2  | Evaporator cost+Pressure drop                                                     | NSGA-II                  | System+Heat exchanger |                                |
| 106 | 2015 | [.47]  | 3  | Power output+Exergy efficiency +LEC                                               | NSGA-II                  | System                |                                |
| 107 | 2015 | [.27]  | 2  | Exergy efficiency+APR (Heat exchanger area/Power output)                          | NSGA-II                  | System                | TOPSIS                         |
| 108 | 2015 | [.13]  | 2  | Exergy efficiency+LEC                                                             | NSGA-II                  | System                | TOPSIS+LINMAP+ Shannon entropy |

|     | Year | Author | Ns | Optimization objective                                                  | Optimization method                              | Parameter level       | Decision making |
|-----|------|--------|----|-------------------------------------------------------------------------|--------------------------------------------------|-----------------------|-----------------|
| 109 | 2015 | [12]   | 2  | Exergy efficiency+LEC                                                   | NSGA-II                                          | System                | TOPSIS          |
| 110 | 2015 | [131]  | 2  | Turbine design efficiency+Off-design efficiency                         | MOGA                                             | Turbine               |                 |
| 111 | 2015 | [19]   | 2  | Power output+Total cost                                                 | MOGA                                             | System                |                 |
| 112 | 2014 | [79]   | 2  | Custom: Tracking error+ Entropy of superheat                            | EDA/PMBGA (Estimation of distribution algorithm) | System                |                 |
| 113 | 2014 | [49]   | 3  | Mass+Carbon emission+NPV                                                | NSGA-II                                          | System+Heat exchanger |                 |
| 114 | 2014 | [16]   | 2  | Power output+Total cost                                                 | NSGA-II                                          | System                |                 |
| 115 | 2014 | [72]   | 2  | Power output+Heat exchanger volume                                      | NSGA-II                                          | System+Heat exchanger |                 |
| 116 | 2013 | [8]    | 2  | Exergy efficiency+Total cost                                            | NSGA-II                                          | System                | LINMAP          |
| 117 | 2013 | [125]  | 2  | Heat exchanger area+Pressure drop                                       | NSGA-II                                          | Heat exchanger        |                 |
| 118 | 2013 | [74]   | 3  | Thermal efficiency+ Volume+ NPV                                         | NSGA-II                                          | System+Heat exchanger |                 |
| 119 | 2013 | [76]   | 4  | Exergy efficiency+Thermal efficiency+ Flammability                      | SA (simulated annealing algorithm)               | System+Fluid          |                 |
| 120 | 2012 | [81]   | 2  | Thermal efficiency+Heat exchanger area/Power output                     | WSM+SA                                           | System                |                 |
| 121 | 2012 | [9]    | 2  | Thermal efficiency+Heat exchanger area/Power output                     | WSM+SA                                           | System                |                 |
| 122 | 2010 | [136]  | 5  | Density+Latent heat+heat transfer coefficient+ Specific heat, viscosity | SA                                               | System+Fluid          |                 |
